# Supplementary material for: Highly efficient synthesis of random isobutylene/alkenyl styrene copolymers with pendant vinyl groups via cationic polymerization for versatile functionalization
Source: Royal Society of Chemistry journal article supplement (doi:10.1039/d4py01242a), 2025-01-01
Supplement: d4py01242a1.pdf [file d4py01242a1.pdf]

### Highly Efficient Synthesis of Random Isobutylene/Alkenyl Styrene Copolymers with Pendant Vinyl Groups via Cationic Polymerization for Versatile Functionalization

He-Ying Wang, Feng-Yu Zhang, Si-Hao Li, Zi-Yang Song, Yang Wang, Yi-Xian Wu\*

State Key Laboratory of Chemical Resource Engineering, Beijing University of Chemical Technology,  
Beijing 100029, China.

Email: wuyx@mail.buct.edu.cn

#### Electronic Supplementary Information (ESI)

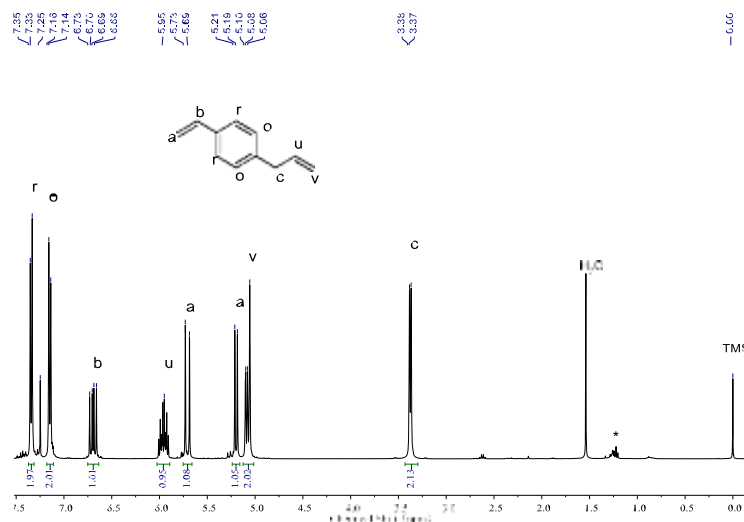

Fig. S1 <sup>1</sup>H NMR spectrum of 4-allylstyrene (400 MHz, CDCl<sub>3</sub>). (\* Impurity: *n*-hexane)

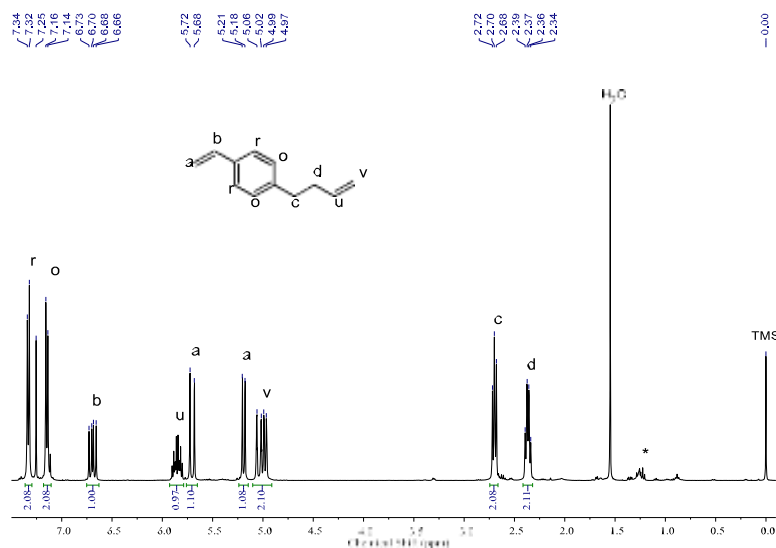

Fig. S2 <sup>1</sup>H NMR spectrum of *p*-(3-butenyl)-styrene (400 MHz, CDCl<sub>3</sub>). (\* Impurity: *n*-hexane)

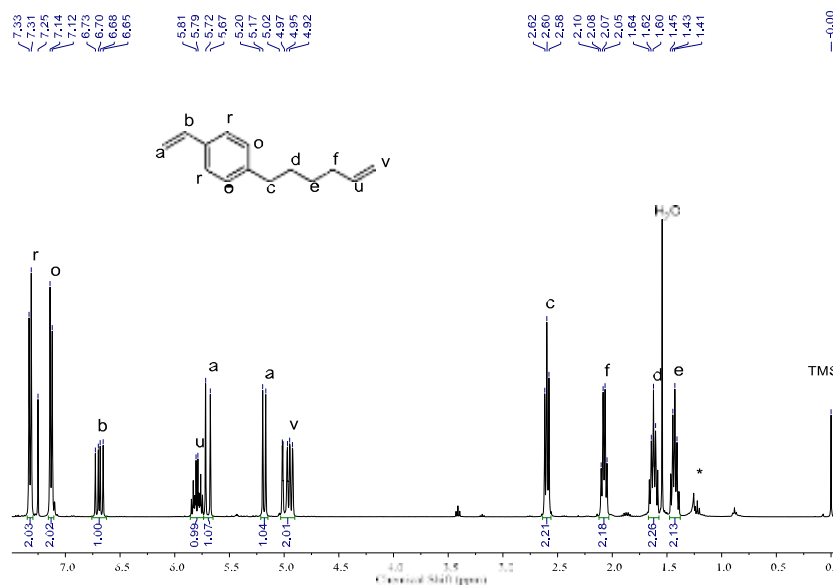

**Fig. S3**  $^1\text{H}$  NMR spectrum of *p*-(5-hexenyl)-styrene (400 MHz,  $\text{CDCl}_3$ ). (\* Impurity: *n*-hexane)

**Table S1** Cationic copolymerization of IB and AS with *t*-BuCl/ $\text{FeCl}_3$ /*i*PrOH initiating system<sup>a</sup>

| Samples                | [AS]:[IB] | Yield (%) | $M_{n,theo}$ (g/mol) | $M_n^c$ (g/mol) | $M_w/M_n$ | $F_{AS}^d$ (%) | BSB <sup>e</sup> (%) | SS <sup>e</sup> (%) | Others <sup>e</sup> (%) | $C_{AS}^f$ (%) | $C_{IB}^f$ (%) | $T_g$ (°C) |
|------------------------|-----------|-----------|----------------------|-----------------|-----------|----------------|----------------------|---------------------|-------------------------|----------------|----------------|------------|
| PIB-13.1k <sup>b</sup> | 0:100     | 92.9      | 1900                 | 13100           | 1.37      | -              | -                    | -                   | -                       | -              | -              | -65.1      |
| IBAS-12.4k-0.7         | 1:100     | 94.6      | 2000                 | 12400           | 1.48      | 0.71           | 64                   | 7                   | 29                      | 68.1           | 95.2           | -63.6      |
| IBAS-10.2k-2.1         | 3:100     | 91.7      | 2100                 | 10200           | 1.56      | 2.15           | 45                   | 10                  | 45                      | 68.4           | 93.4           | -61.7      |
| IBAS-8.3k-4.2          | 5:100     | 85.2      | 2200                 | 8300            | 1.52      | 4.20           | 42                   | 21                  | 37                      | 75.7           | 86.4           | -60.2      |
| IBAS-7.8k-8.6          | 10:100    | 86.4      | 2400                 | 7800            | 1.69      | 8.60           | 33                   | 47                  | 20                      | 82.2           | 87.4           | -60.7      |
| IBAS-7.8k-14.2         | 15:100    | 84.6      | 2700                 | 7800            | 1.82      | 14.23          | 24                   | 42                  | 34                      | 90.8           | 82.1           | -59.5      |

<sup>a</sup> Conditions: [IB] = 1 mol/L, 20 mL *n*-hexane/ $\text{CH}_2\text{Cl}_2$  = 60/40 (v/v),  $-80^\circ\text{C}$ , polymerization time: 20 min. <sup>b</sup> [*i*PrOH]/ $[\text{FeCl}_3]$  = 1.4 (molar ratio), [*t*-BuCl]/ $[\text{FeCl}_3]$ /[IB] = 1/3/35 (molar ratio). <sup>c</sup>  $M_n$  determined by GPC with respect to a polystyrene standard. <sup>d</sup> Incorporation of AS determined by  $^1\text{H}$  NMR with Eq. (1). <sup>e</sup> Molar ratio of monomer sequence calculated by Eq. (4), (5) and (6). <sup>f</sup> Conversion of AS and IB calculated by Eq. (7) and (8).

**Table S2** Cationic copolymerization of IB and BS with *t*-BuCl/ $\text{FeCl}_3$ /*i*PrOH initiating system<sup>a</sup>

| NO.                         | [BS]:[IB] | Yield (%) | $M_{n,theo}$ (g/mol) | $M_n^c$ (g/mol) | $M_w/M_n$ | $F_{BS}^d$ (%) | BSB <sup>e</sup> (%) | Others <sup>e</sup> (%) | $C_{BS}^f$ (%) | $C_{IB}^f$ (%) |
|-----------------------------|-----------|-----------|----------------------|-----------------|-----------|----------------|----------------------|-------------------------|----------------|----------------|
| IBBS-5.7k-0.85 <sup>b</sup> | 1:100     | 96.8      | 1000                 | 5700            | 1.45      | 0.85           | 71                   | 29                      | 83.4           | 97.2           |
| IBBS-4.5k-2.45              | 3:100     | 86.1      | 1000                 | 4500            | 1.39      | 2.45           | 68                   | 32                      | 73.0           | 87.2           |
| IBBS-4.2k-4.68              | 5:100     | 86.3      | 1100                 | 4200            | 1.39      | 4.68           | 70                   | 30                      | 85.0           | 86.5           |
| IBBS-4.0k-10.56             | 10:100    | 87.9      | 1200                 | 4000            | 1.42      | 10.56          | 51                   | 49                      | 99.8           | 84.5           |
| IBBS-4.0k-15.83             | 15:100    | 85.5      | 1400                 | 4000            | 1.43      | 15.83          | 43                   | 57                      | 99.6           | 79.5           |

<sup>a</sup> Conditions: [IB] = 1 mol/L, 20 mL *n*-hexane/ $\text{CH}_2\text{Cl}_2$  = 60/40 (v/v),  $-80^\circ\text{C}$ , polymerization time: 20 min. <sup>b</sup>

$[iPrOH]/[FeCl_3] = 1.4$  (molar ratio),  $[t-BuCl]/[FeCl_3]/[IB] = 1/3/18$  (molar ratio). <sup>c</sup>  $M_n$  determined by GPC with respect to a polystyrene standard. <sup>d</sup> Incorporation of BS determined by <sup>1</sup>H NMR with Eq. (2). <sup>e</sup> Molar ratio of monomer sequence calculated by Eq. (4). <sup>f</sup> Conversion of BS and IB calculated by Eq. (9) and (10).

**Table S3** Cationic copolymerization of IB and HS with  $t-BuCl/FeCl_3/iPrOH$  initiating system<sup>a</sup>

| NO.                          | [HS]:[IB] | Yield (%) | $M_{n,theo}$ (g/mol) | $M_n^c$ (g/mol) | $M_w/M_n$ | $F_{HS}^d$ (%) | BSB <sup>e</sup> (%) | Others <sup>e</sup> (%) | $C_{HS}^f$ (%) | $C_{IB}^f$ (%) |
|------------------------------|-----------|-----------|----------------------|-----------------|-----------|----------------|----------------------|-------------------------|----------------|----------------|
| IBHS-14.1k-0.79 <sup>b</sup> | 1:100     | 99.3      | 2000                 | 14100           | 1.43      | 0.79           | 65                   | 35                      | 80.1           | 99.9           |
| IBHS-11.6k-1.86              | 3:100     | 86.2      | 2100                 | 11600           | 1.49      | 1.86           | 53                   | 47                      | 56.5           | 89.1           |
| IBHS-9.9k-3.42               | 5:100     | 81.5      | 2200                 | 9900            | 1.46      | 3.42           | 58                   | 42                      | 60.3           | 85.0           |
| IBHS-9.9k-6.45               | 10:100    | 86.3      | 2600                 | 9900            | 1.48      | 6.45           | 49                   | 51                      | 64.5           | 93.5           |
| IBHS-8.8k-11.39              | 15:100    | 74.3      | 2900                 | 8800            | 1.48      | 11.39          | 36                   | 64                      | 66.9           | 78.1           |

<sup>a</sup> Conditions:  $[IB] = 1$  mol/L, 20 mL  $n$ -hexane/ $CH_2Cl_2 = 60/40$  (v/v),  $-80^\circ C$ , polymerization time: 20 min. <sup>b</sup>  $[iPrOH]/[FeCl_3] = 1.4$  (molar ratio),  $[t-BuCl]/[FeCl_3]/[IB] = 1/3/35$  (molar ratio). <sup>c</sup>  $M_n$  determined by GPC with respect to a polystyrene standard. <sup>d</sup> Incorporation of HS determined by <sup>1</sup>H NMR with Eq. (3). <sup>e</sup> Molar ratio of monomer sequence calculated by Eq. (4). <sup>f</sup> Conversion of HS and IB calculated by Eq. (11) and (12).

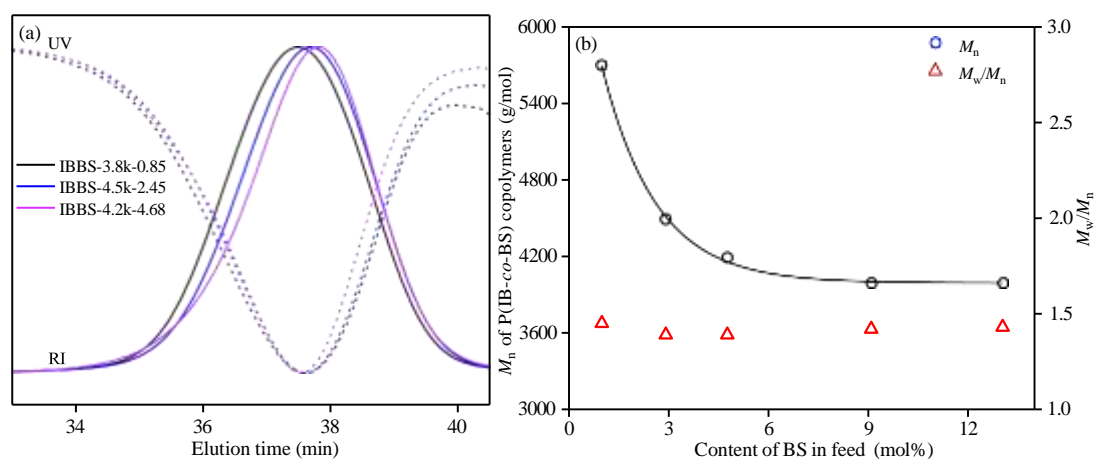

**Fig. S4** (a) GPC traces of P(IB-co-BS) copolymers with various contents of BS units, (b)  $M_n$  and  $M_w/M_n$  of P(IB-co-BS) copolymers.

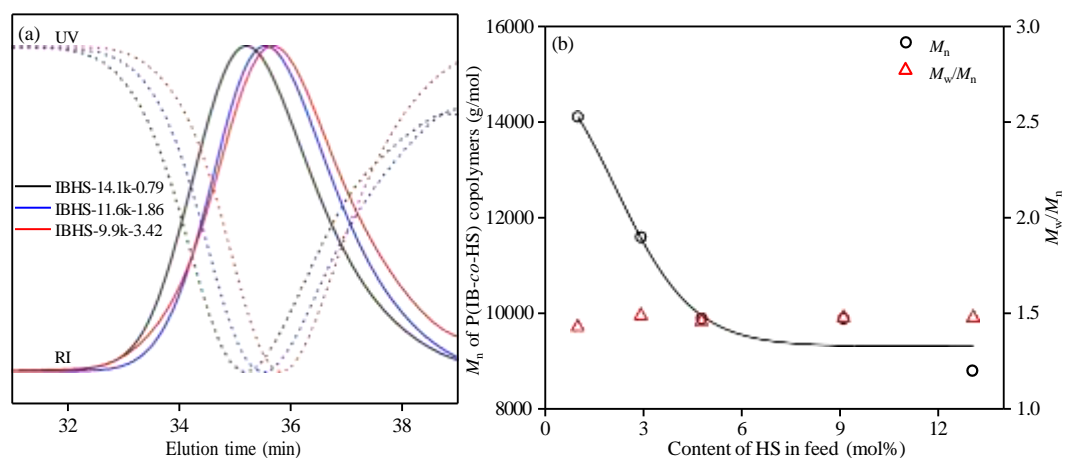

**Fig. S5** (a) GPC traces of P(IB-co-HS) copolymers with various contents of HS units, (b)  $M_n$  and  $M_w/M_n$  of P(IB-co-HS) copolymers.

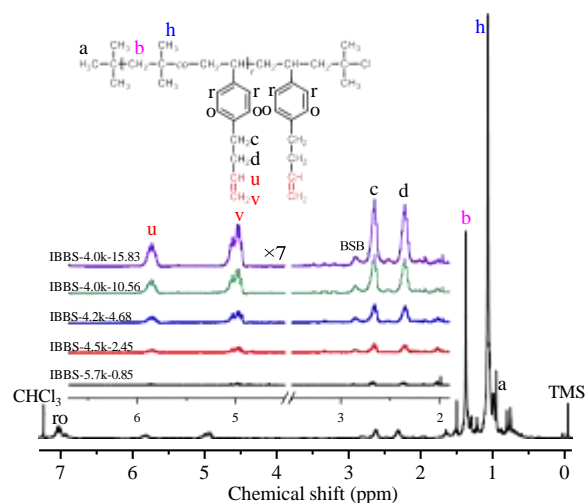

Fig. S6  $^1\text{H}$  NMR spectra of P(IB-co-BS) copolymers with various contents of BS units.

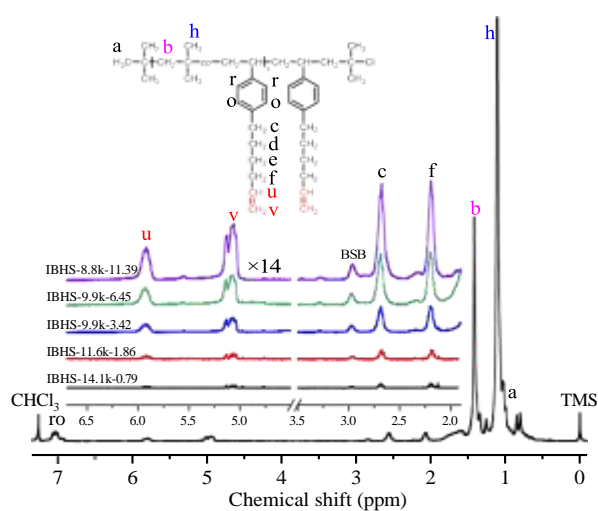

Fig. S7  $^1\text{H}$  NMR spectra of P(IB-co-HS) copolymers with various contents of HS units.

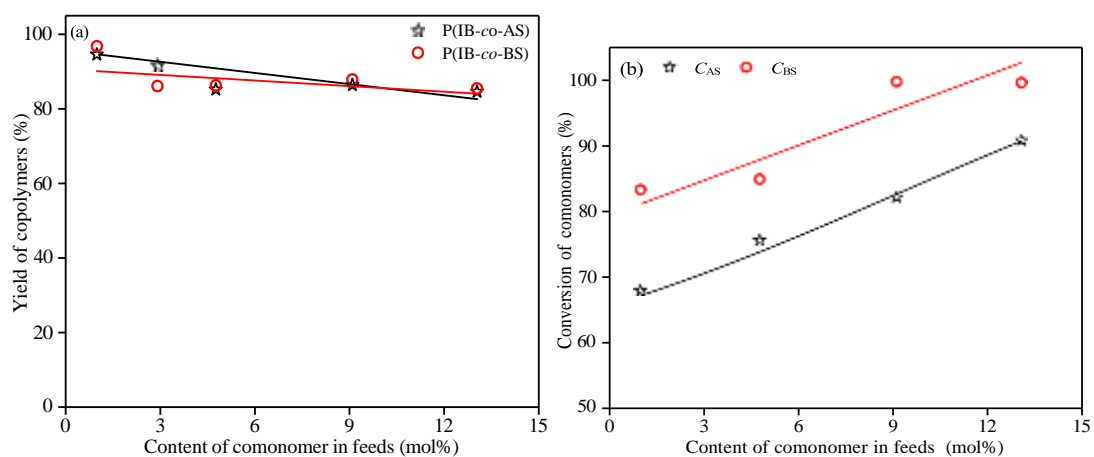

Fig. S8 (a) The P(IB-co-AS), P(IB-co-BS) and P(IB-co-HS) copolymers yields versus various feed ratios, (b) conversions of AS/BS/HS versus various feed ratios.

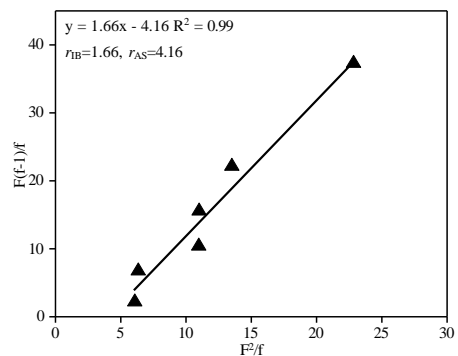

**Fig. S9** Fineman-Ross plot for the copolymerization of IB with AS.

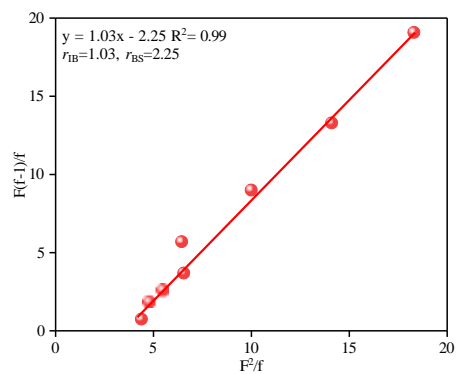

**Fig. S10** Fineman-Ross plot for the copolymerization of IB with BS.

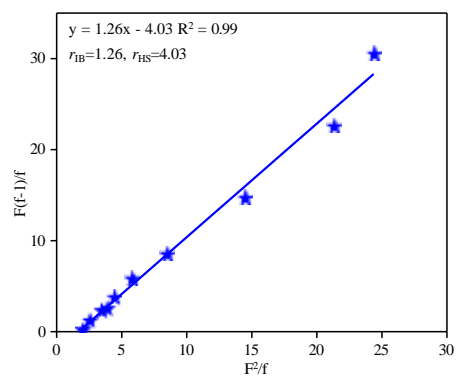

**Fig. S11** Fineman-Ross plot for the copolymerization of IB with HS.

**Table S4** Copolymerization of IB with AS with *t*-BuCl/FeCl<sub>3</sub>/*i*PrOH initiating system at different reaction time <sup>a</sup>

| NO.           | Time<br>(s) | Yield<br>(%) | $M_n^c$<br>(g/mol) | $M_w/M_n$ | $F_{AS}^d$<br>(%) | $C_{AS}^f$<br>(%) | $C_{IB}^f$<br>(%) | BSB <sup>e</sup><br>(%) | SS <sup>e</sup><br>(%) | Others <sup>e</sup><br>(%) |
|---------------|-------------|--------------|--------------------|-----------|-------------------|-------------------|-------------------|-------------------------|------------------------|----------------------------|
| 20230426-10s  | 10          | 4.0          | -                  | -         | 1.75              | 2.4               | 4.1               | 23                      | 30                     | 47                         |
| 20230416-30s  | 30          | 12.5         | -                  | -         | 1.20              | 5.2               | 13                | 25                      | 12                     | 63                         |
| 20230416-50s  | 50          | 24.4         | -                  | -         | 1.30              | 11.4              | 25.4              | 36                      | 23                     | 41                         |
| 20230416-70s  | 70          | 50.0         | 3500               | 1.21      | 1.65              | 30.3              | 51.5              | 36                      | 29                     | 35                         |
| 20230416-85s  | 85          | 53.6         | 3900               | 1.33      | 1.76              | 30.5              | 55.4              | 36                      | 10                     | 54                         |
| 20230416-100s | 100         | 66.1         | 3900               | 1.30      | 1.83              | 42.1              | 68.0              | 31                      | 16                     | 53                         |
| 20230416-115s | 115         | 69.0         | 4000               | 1.35      | 1.91              | 44.1              | 70.9              | 41                      | 22                     | 37                         |
| 20230416-130s | 130         | 72.0         | 4100               | 1.41      | 1.94              | 47.9              | 73.8              | 31                      | 16                     | 53                         |
| 20230416-165s | 165         | 80.9         | 4200               | 1.37      | 1.96              | 54.6              | 82.9              | 33                      | 29                     | 38                         |
| 20230416-200s | 200         | 83.7         | 4200               | 1.41      | 2.2               | 60.8              | 85.4              | 30                      | 24                     | 47                         |
| 20230416-250s | 250         | 84.3         | 4200               | 1.56      | 2.27              | 63.8              | 85.8              | 30                      | 18                     | 52                         |
| 20230416-300s | 300         | 88.5         | 4300               | 2.73      | 2.29              | 62.3              | 90.6              | 35                      | 21                     | 44                         |
| 20230416-400s | 400         | 94.0         | 4700               | 1.72      | 2.29              | 68.8              | 95.9              | 33                      | 25                     | 42                         |

<sup>a</sup> Conditions: [IB] = 0.5 mol/L, [AS]/[IB] = 3/100 (molar ratio), 10 mL *n*-hexane/CH<sub>2</sub>Cl<sub>2</sub> = 60/40 (v/v), -80 °C. <sup>b</sup> [iPrOH]/[FeCl<sub>3</sub>] = 1.4 (molar ratio), [t-BuCl]/[FeCl<sub>3</sub>]/[IB] = 1/3/18 (molar ratio). <sup>c</sup>  $M_n$  determined by GPC with respect to a polystyrene standard. <sup>d</sup> Incorporation of AS determined by <sup>1</sup>H NMR with Eq. (1). <sup>e</sup> Molar ratio of monomer sequence calculated by Eq. (4), (5) and (6). <sup>f</sup> Conversion of AS and IB were calculated according to Eq. (7) and Eq. (8).

**Table S5** Copolymerization of IB with BS with *t*-BuCl/FeCl<sub>3</sub>/*i*PrOH initiating system at different reaction time <sup>a</sup>

| NO.                      | Time<br>(s) | Yield<br>(%) | $M_n^c$<br>(g/mol) | $M_w/M_n$ | $F_{BS}^d$<br>(%) | $C_{BS}^f$<br>(%) | $C_{IB}^f$<br>(%) | BSB <sup>e</sup><br>(%) | Others <sup>e</sup><br>(%) |
|--------------------------|-------------|--------------|--------------------|-----------|-------------------|-------------------|-------------------|-------------------------|----------------------------|
| 20231011-5s <sup>b</sup> | 5           | 0.9          | -                  | -         | 0.72              | 0.4               | 0.9               | 52                      | 48                         |
| 20231011-10s             | 10          | 2.3          | -                  | -         | 0.86              | 1.4               | 2.3               | 32                      | 68                         |
| 20231011-15s             | 15          | 10.9         | -                  | -         | 0.88              | 6.5               | 11.1              | 50                      | 50                         |
| 20231011-20s             | 20          | 28.1         | -                  | -         | 1.04              | 19.9              | 28.4              | 39                      | 61                         |
| 20231011-25s             | 25          | 29.8         | 3800               | 1.25      | 1.03              | 20.9              | 30.1              | 36                      | 64                         |
| 20231011-30s             | 30          | 33.8         | 3900               | 1.26      | 1.08              | 24.9              | 34.2              | 48                      | 52                         |
| 20231011-35s             | 35          | 57.1         | 4400               | 1.29      | 1.12              | 43.5              | 57.7              | 42                      | 58                         |
| 20231011-40s             | 40          | 60.4         | 4400               | 1.29      | 1.19              | 48.8              | 60.8              | 42                      | 58                         |
| 20231011-45s             | 45          | 65.6         | 4500               | 1.34      | 1.09              | 48.7              | 66.3              | 58                      | 42                         |
| 20231011-50s             | 50          | 79.5         | 4500               | 1.37      | 1.20              | 64.9              | 80.1              | 52                      | 48                         |
| 20231011-60s             | 60          | 79.7         | 4800               | 1.34      | 1.25              | 67.6              | 80.2              | 47                      | 53                         |
| 20231011-100s            | 100         | 99.2         | 4900               | 1.43      | 1.22              | 82.2              | 99.9              | 54                      | 46                         |

<sup>a</sup> Conditions: [IB] = 0.5 mol/L, [BS]/[IB] = 1.5/100 (molar ratio), 10 mL *n*-hexane/CH<sub>2</sub>Cl<sub>2</sub> = 60/40 (v/v), -80 °C. <sup>b</sup> [iPrOH]/[FeCl<sub>3</sub>] = 1.4 (molar ratio), [t-BuCl]/[FeCl<sub>3</sub>]/[IB] = 1/3/18 (molar ratio). <sup>c</sup>  $M_n$  determined by GPC with respect to a polystyrene standard. <sup>d</sup> Incorporation of BS determined by <sup>1</sup>H NMR with Eq. (2). <sup>e</sup> Molar ratio of monomer sequence calculated by Eq. (4). <sup>f</sup> Conversion of BS and IB were calculated according to Eq. (9) and Eq. (10).

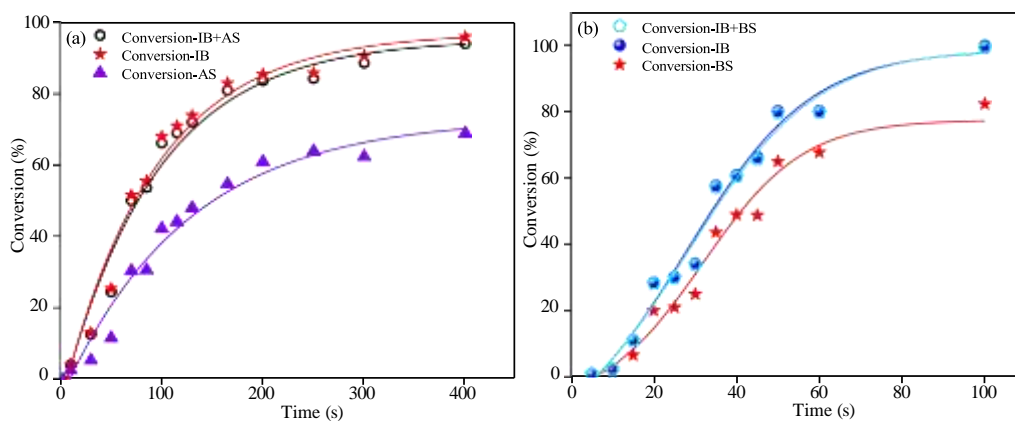

**Fig. S12** (a)Plots of P(IB-co-AS) yields and conversions of IB and AS versus reaction time and (b)Plots of P(IB-co-BS) yields and conversions of IB and BS versus reaction time.

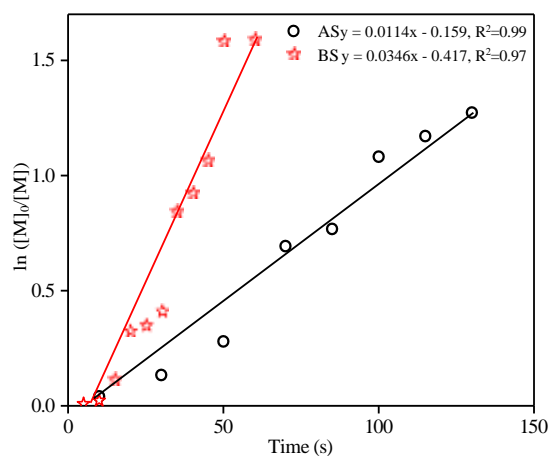

**Fig. S13** First order  $\ln([M]_0/[M])$ -time plots for the copolymerization of IB with AS or BS.

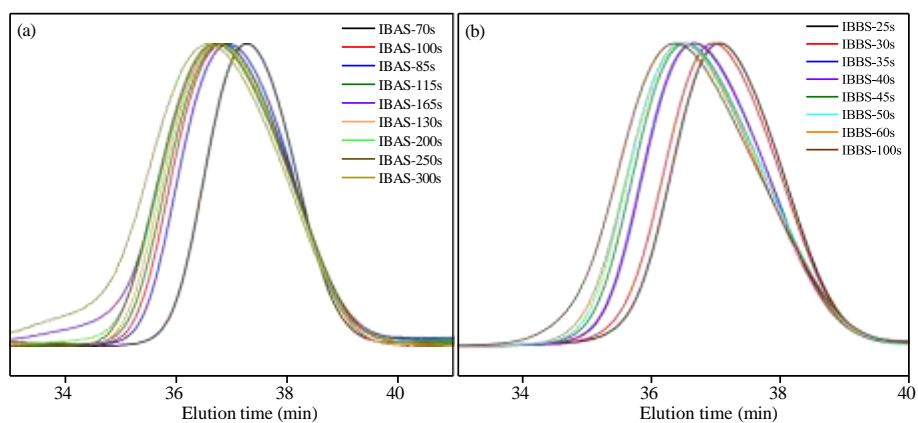

**Fig. S14** (a)GPC traces of P(IB-co-AS) and (b)GPC traces of P(IB-co-BS) obtained with  $t$ -BuCl/FeCl<sub>3</sub>/ $i$ PrOH initiating system at different reaction time

**Table S6** AMI and IMA experiments of IB with AS by using *t*-BuCl/FeCl<sub>3</sub>/*i*PrOH initiating system <sup>a</sup>

| j  | W <sub>p</sub><br>g | Yield<br>(%) | M <sub>n</sub> <sup>c</sup><br>(g/mol) | M <sub>w</sub> /M <sub>n</sub> | F <sub>AS</sub> <sup>d</sup><br>(%) | BSB <sup>e</sup><br>(%) | SS <sup>e</sup><br>(%) | Others <sup>e</sup><br>(%) | C <sub>AS</sub> <sup>f</sup><br>(%) | C <sub>IB</sub> <sup>f</sup><br>(%) |
|----|---------------------|--------------|----------------------------------------|--------------------------------|-------------------------------------|-------------------------|------------------------|----------------------------|-------------------------------------|-------------------------------------|
| 1  | 0.27                | 74.8         | 6000                                   | 1.43                           | 1.95                                | 51                      | 47                     | 2                          | 50.8                                | 76.7                                |
| 2  | 0.61                | 84.9         | 8200                                   | 1.64                           | 2.59                                | 42                      | 37                     | 21                         | 75.9                                | 85.6                                |
| 3  | 0.98                | 90.9         | 9900                                   | 1.54                           | 2.41                                | 55                      | 40                     | 5                          | 75.8                                | 92.1                                |
| 4  | 1.44                | 99.8         | 12200                                  | 1.49                           | 2.78                                | 55                      | 33                     | 12                         | 95.4                                | 100                                 |
| 5  | 1.79                | 99.4         | 13300                                  | 1.51                           | 2.47                                | 54                      | 29                     | 17                         | 84.8                                | 100                                 |
| 6  | 2.17                | 99.9         | 16700                                  | 1.48                           | 2.18                                | 64                      | 35                     | 1                          | 75.6                                | 100                                 |
| 7  | 0.34                | 92.6         | 5600                                   | 1.51                           | 2.12                                | 67                      | 30                     | 3                          | 68.2                                | 94.5                                |
| 8  | 0.64                | 88.0         | 6200                                   | 1.50                           | 1.87                                | 64                      | 34                     | 2                          | 57.6                                | 90.7                                |
| 9  | 0.94                | 86.9         | 9500                                   | 1.57                           | 2.27                                | 47                      | 30                     | 23                         | 68.4                                | 88.4                                |
| 10 | 1.34                | 92.9         | 10800                                  | 1.53                           | 2.10                                | 60                      | 38                     | 2                          | 67.8                                | 94.9                                |
| 11 | 1.74                | 96.6         | 12600                                  | 1.53                           | 2.15                                | 60                      | 38                     | 2                          | 72.1                                | 98.5                                |
| 12 | 2.19                | 99.9         | 13100                                  | 1.53                           | 2.37                                | 55                      | 18                     | 27                         | 81.9                                | 100                                 |

<sup>a</sup> Conditions: [IB] = 1 mol/L, -80 °C, *n*-hexane/CH<sub>2</sub>Cl<sub>2</sub> = 60/40 (v/v), [AS]/[IB] = 3/100 (molar ratio). <sup>b</sup> [*i*PrOH]/[FeCl<sub>3</sub>] = 1.4 (molar ratio), [*t*-BuCl]/[FeCl<sub>3</sub>] = 1/5 (molar ratio). <sup>c</sup> M<sub>n</sub> determined by GPC with respect to a polystyrene standard. <sup>d</sup> Incorporation of AS is determined by <sup>1</sup>H NMR with Eq. (1). <sup>e</sup> Molar ratio of monomer sequence calculated by Eq. (4), (5) and (6). <sup>f</sup> Conversion of AS and IB were calculated according to Eq. (7) and Eq. (8).

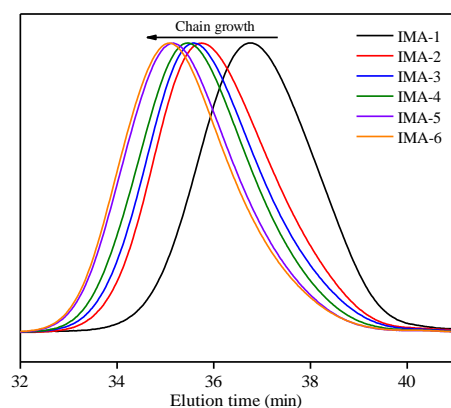**Fig. S15** GPC traces of P(IB-co-AS) copolymers obtained in IMA experiments.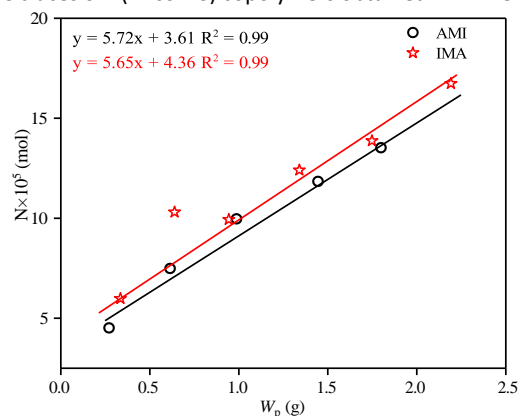**Fig. S16** Number of polymer chains versus  $W_p$  in AMI and IMA experiments.



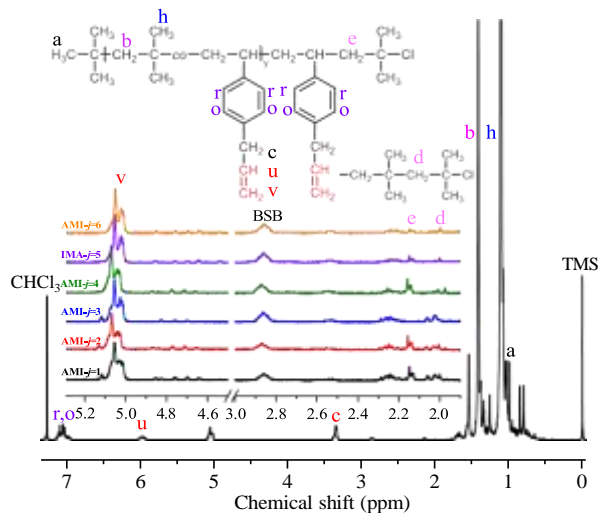

Fig. S17  $^1\text{H}$  NMR spectra of P(IB-co-AS) copolymers in AMI experiments.

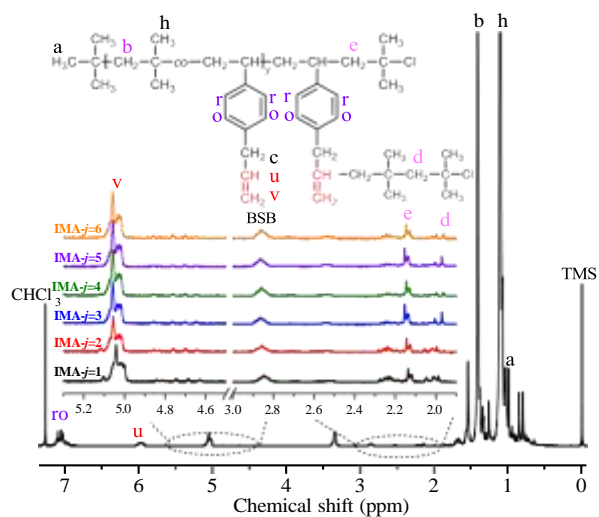

Fig. S18  $^1\text{H}$  NMR spectra of P(IB-co-AS) copolymers in IMA experiments.

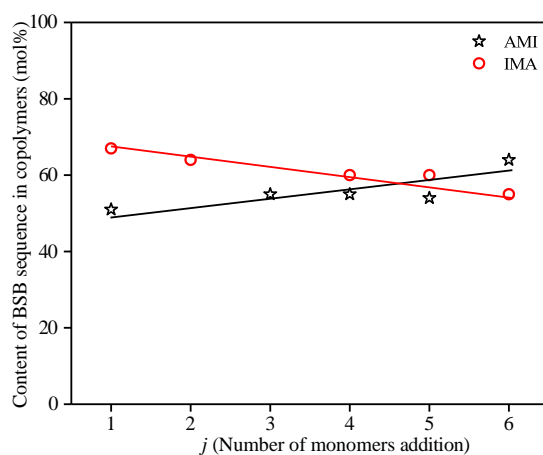

Fig. S19 Evolution content of BSB sequence in P(IB-co-AS) copolymers as a function of  $j$  in AMI and IMA experiments.

**Table S7** Effect of temperature on the copolymerization of IB with AS initiated with *t*-BuCl/FeCl<sub>3</sub>/*i*PrOH system <sup>a</sup>

| Samples                     | T<br>(°C) | Yield<br>(%) | $M_n^c$<br>(g/mol) | $M_w/M_n$ | $F_{AS}^d$<br>(%) | BSB <sup>e</sup><br>(%) | SS <sup>e</sup><br>(%) | Others <sup>e</sup><br>(%) | $C_{AS}^f$<br>(%) | $C_{IB}^f$<br>(%) |
|-----------------------------|-----------|--------------|--------------------|-----------|-------------------|-------------------------|------------------------|----------------------------|-------------------|-------------------|
| IBAS-4.7k-2.24 <sup>b</sup> | -80       | 82.6         | 4700               | 1.47      | 2.32              | 42                      | 29                     | 29                         | 66.4              | 83.9              |
| IBAS-4.7k-2.18              | -75       | 78.9         | 4700               | 1.50      | 2.25              | 42                      | 32                     | 26                         | 61.5              | 80.3              |
| IBAS-4.5k-2.17              | -70       | 82.7         | 4500               | 1.47      | 2.03              | 47                      | 40                     | 13                         | 58.5              | 84.6              |
| IBAS-4.3k-2.34              | -65       | 79.9         | 4300               | 1.45      | 2.19              | 1                       | 35                     | 64                         | 60.9              | 81.4              |
| IBAS-4.0k-2.08              | -60       | 80.5         | 4000               | 1.43      | 2.12              | 58                      | 28                     | 14                         | 59.4              | 82.1              |
| IBAS-3.6k-2.34              | -55       | 75.3         | 3600               | 1.40      | 2.21              | 69                      | 30                     | 1                          | 57.9              | 76.7              |
| IBAS-3.2k-2.59              | -50       | 74.7         | 3200               | 1.39      | 2.45              | 65                      | 27                     | 8                          | 63.2              | 75.6              |
| IBAS-2.8k-2.64              | -45       | 62.7         | 2800               | 1.38      | 2.46              | 78                      | 21                     | 1                          | 53.2              | 63.4              |
| IBAS-2.54k-2.76             | -40       | 60.8         | 2500               | 1.34      | 2.52              | 75                      | 18                     | 7                          | 52.9              | 61.5              |
| IBAS-2.2k-2.66              | -35       | 49.3         | 2200               | 1.31      | 2.66              | 81                      | 18                     | 1                          | 45.3              | 49.7              |
| IBAS-2.0k-3.31              | -30       | 40.4         | 2000               | 1.27      | 3.32              | 76                      | 22                     | 2                          | 45.8              | 40.0              |

<sup>a</sup> Conditions: [IB] = 1 mol/L, 10 mL *n*-hexane/CH<sub>2</sub>Cl<sub>2</sub> = 60/40 (v/v), polymerization time: 20 min, [*i*PrOH]/[FeCl<sub>3</sub>] = 1.4 (molar ratio). <sup>b</sup> [*t*-BuCl]/[FeCl<sub>3</sub>]/[IB] = 1/3/18 (molar ratio). <sup>c</sup>  $M_n$  determined by GPC with respect to a polystyrene standard. <sup>d</sup> Incorporation of AS is determined by <sup>1</sup>H NMR with Eq. (1). <sup>e</sup> Molar ratio of monomer sequence calculated by Eq. (4), (5) and (6). <sup>f</sup> Conversion of AS and IB were calculated according to Eq. (7) and Eq. (8).

**Table S8** Effect of temperature on the copolymerization of IB with BS initiated with *t*-BuCl/FeCl<sub>3</sub>/*i*PrOH system <sup>a</sup>

| NO.                         | T<br>(°C) | Yield<br>(%) | $M_n^c$<br>(g/mol) | $M_w/M_n$ | $F_{BS}^d$<br>(%) | BSB <sup>e</sup><br>(%) | Others <sup>e</sup><br>(%) | $C_{BS}^f$<br>(%) | $C_{IB}^f$<br>(%) |
|-----------------------------|-----------|--------------|--------------------|-----------|-------------------|-------------------------|----------------------------|-------------------|-------------------|
| IBBS-5.7k-2.07 <sup>b</sup> | -80       | 88.3         | 5700               | 1.49      | 2.07              | 54                      | 46                         | 63.6              | 90.3              |
| IBBS-5.9k-2.49              | -75       | 76.4         | 5900               | 1.45      | 2.49              | 54                      | 46                         | 65.8              | 77.3              |
| IBBS-5.0k-2.43              | -70       | 77.9         | 5000               | 1.41      | 2.43              | 44                      | 56                         | 65.5              | 78.9              |
| IBBS-4.6k-2.29              | -65       | 79.7         | 4600               | 1.48      | 2.29              | 58                      | 42                         | 63.3              | 81.1              |
| IBBS-4.7k-2.28              | -60       | 78.3         | 4700               | 1.45      | 2.28              | 72                      | 28                         | 61.9              | 79.7              |
| IBBS-4.3k-2.48              | -55       | 77.2         | 4300               | 1.41      | 2.48              | 79                      | 21                         | 66.2              | 78.1              |
| IBBS-3.9k-2.37              | -50       | 75.2         | 3900               | 1.37      | 2.37              | 72                      | 28                         | 61.7              | 76.3              |
| IBBS-3.6k-2.46              | -45       | 70.3         | 3600               | 1.38      | 2.46              | 58                      | 42                         | 59.8              | 71.2              |
| IBBS-2.7k-2.65              | -40       | 68.8         | 2700               | 1.38      | 2.65              | 63                      | 37                         | 62.9              | 69.3              |
| IBBS-2.3k-2.63              | -35       | 62.9         | 2300               | 1.34      | 2.63              | 80                      | 20                         | 57.1              | 63.4              |

<sup>a</sup> Conditions: [IB] = 1 mol/L, 10 mL *n*-hexane/CH<sub>2</sub>Cl<sub>2</sub> = 60/40 (v/v). <sup>b</sup> [*i*PrOH]/[FeCl<sub>3</sub>] = 1.4 (molar ratio), polymerization time: 20 min, [*t*-BuCl]/[FeCl<sub>3</sub>]/[IB] = 1/3/18 (molar ratio). <sup>c</sup>  $M_n$  determined by GPC with respect to a polystyrene standard. <sup>d</sup> Incorporation of BS is determined by <sup>1</sup>H NMR with Eq. (2). <sup>e</sup> Molar ratio of monomer sequence calculated by Eq. (4). <sup>f</sup> Conversion of BS and IB were calculated according to Eq. (9) and Eq. (10).

**Table S9** Effect of temperature on the copolymerization of IB with HS initiated with *t*-BuCl/FeCl<sub>3</sub>/*i*PrOH system<sup>a</sup>

| NO.                         | T (°C) | Yield (%) | $M_n^c$ (g/mol) | $M_w/M_n$ | $F_{HS}^d$ (%) | BSB <sup>e</sup> (%) | Others <sup>e</sup> (%) | $C_{HS}^f$ (%) | $C_B^f$ (%) |
|-----------------------------|--------|-----------|-----------------|-----------|----------------|----------------------|-------------------------|----------------|-------------|
| IBHS-7.3k-2.12 <sup>b</sup> | -80    | 86.7      | 7300            | 1.52      | 2.12           | 46                   | 54                      | 64.2           | 88.9        |
| IBHS-7.1k-2.04              | -75    | 90.7      | 7100            | 1.51      | 2.04           | 50                   | 50                      | 64.7           | 93.2        |
| IBHS-6.7k-1.84              | -70    | 96.3      | 6700            | 1.53      | 1.84           | 54                   | 46                      | 62.3           | 99.7        |
| IBHS-6.3k-2.08              | -65    | 95.3      | 6300            | 1.48      | 2.08           | 71                   | 29                      | 69.3           | 97.9        |
| IBHS-5.4k-1.92              | -60    | 78.9      | 5400            | 1.47      | 1.92           | 72                   | 28                      | 53.1           | 81.4        |
| IBHS-5.0k-2.03              | -55    | 69.7      | 5000            | 1.46      | 2.03           | 67                   | 33                      | 49.5           | 71.7        |
| IBHS-4.3k-2.15              | -50    | 74.7      | 4300            | 1.46      | 2.15           | 64                   | 36                      | 56.0           | 76.5        |
| IBHS-3.4k-2.3               | -45    | 70.7      | 3400            | 1.53      | 2.3            | 71                   | 29                      | 56.6           | 72.1        |
| IBHS-3.2k-2.26              | -40    | 68.3      | 3200            | 1.50      | 2.26           | 69                   | 31                      | 53.8           | 69.8        |
| IBHS-2.8k-2.47              | -35    | 63.2      | 2800            | 1.41      | 2.47           | 67                   | 33                      | 54.1           | 64.1        |
| IBHS-2.1k-2.41              | -30    | 55.1      | 2100            | 1.40      | 2.41           | 76                   | 24                      | 46.1           | 55.9        |

<sup>a</sup> Conditions: [IB] = 1 mol/L, 10 mL *n*-hexane/CH<sub>2</sub>Cl<sub>2</sub> = 60/40 (v/v), polymerization time: 20 min, [*i*PrOH]/[FeCl<sub>3</sub>] = 1.4 (molar ratio). <sup>b</sup> [*t*-BuCl]/[FeCl<sub>3</sub>]/[IB] = 1/3/18 (molar ratio). <sup>c</sup>  $M_n$  determined by GPC with respect to a polystyrene standard. <sup>d</sup> Incorporation of HS is determined by <sup>1</sup>H NMR with Eq. (3). <sup>e</sup> Molar ratio of monomer sequence calculated by Eq. (4). <sup>f</sup> Conversion of HS and IB were calculated according to Eq. (11) and Eq. (12).

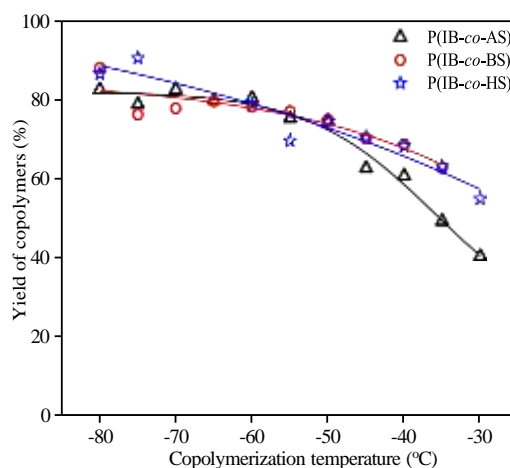

**Fig. S20** P(IB-co-AS), P(IB-co-BS) and P(IB-co-HS) copolymer yields at different copolymerization temperatures.

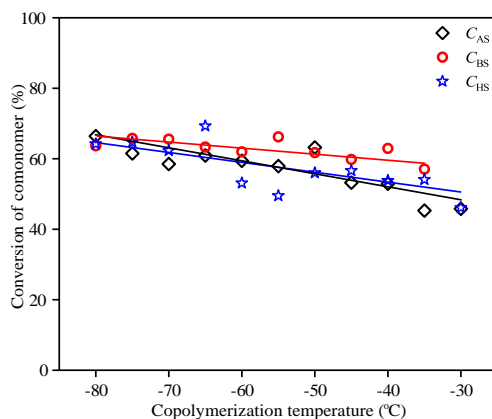

**Fig. S21** Conversions of AS, BS and HS as a function of copolymerization temperature.

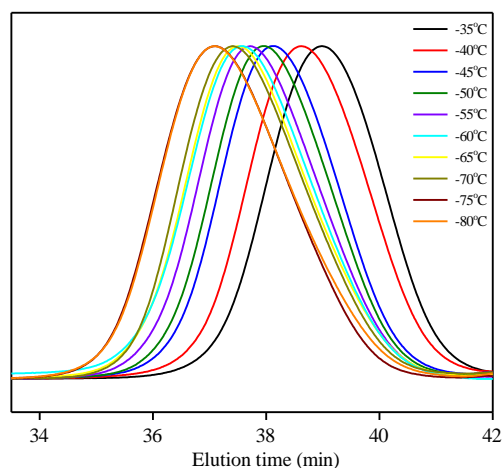

**Fig. S22** GPC curves of P(IB-co-BS) obtained at different copolymerization temperatures with *t*-BuCl/FeCl<sub>3</sub>/*i*PrOH initiating system.

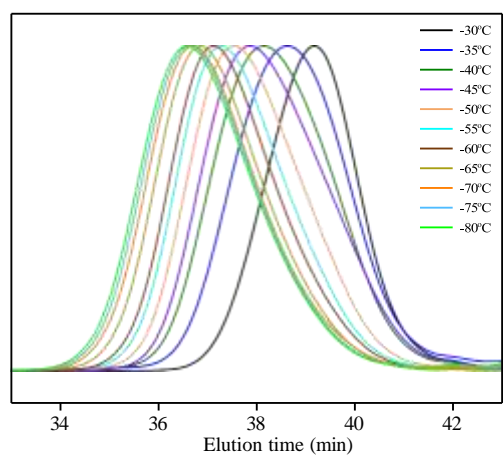

**Fig. S23** GPC curves of P(IB-co-HS) copolymers obtained at different copolymerization temperatures with *t*-BuCl/FeCl<sub>3</sub>/*i*PrOH initiating system.

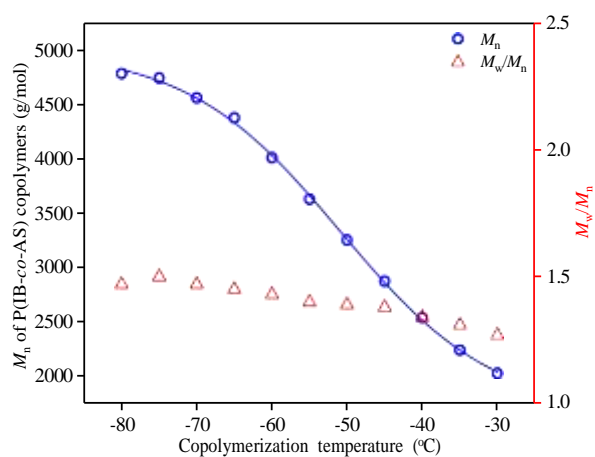

**Fig. S24**  $M_n$  and  $M_w/M_n$  of P(IB-co-AS) copolymers obtained at different copolymerization temperatures.

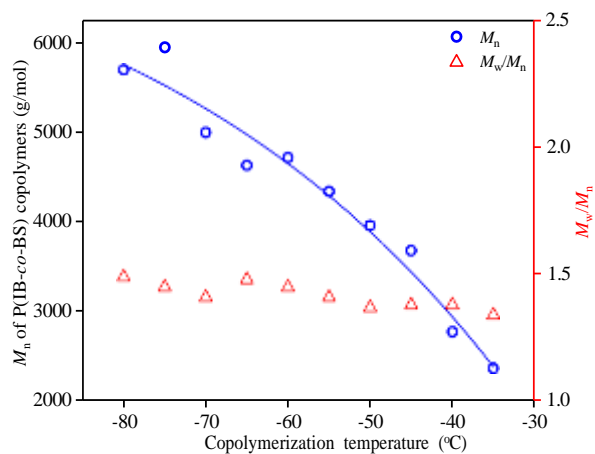

Fig. S25  $M_n$  and  $M_w/M_n$  of P(IB-co-BS) copolymers obtained at different copolymerization temperatures.

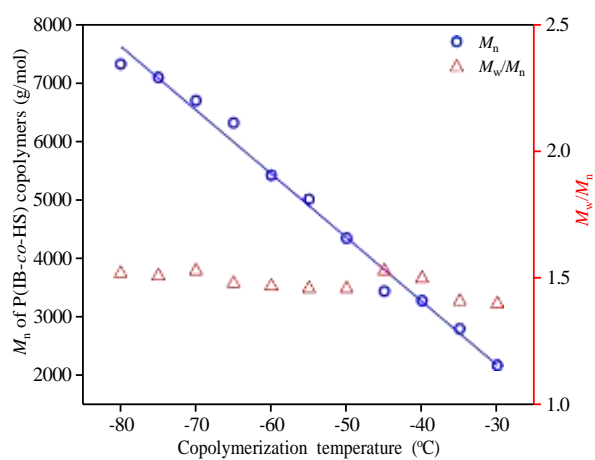

Fig. S26  $M_n$  and  $M_w/M_n$  of P(IB-co-HS) copolymers obtained at different copolymerization temperatures.

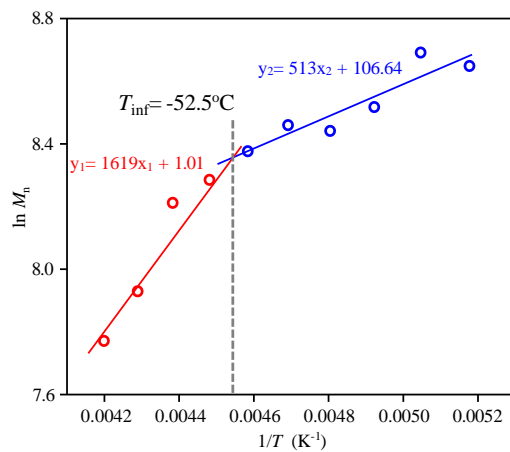

Fig. S27 Arrhenius plots of  $\ln M_n$  versus  $1/T$  for the copolymerization of IB with BS by using *t*-BuCl/FeCl<sub>3</sub>/*i*PrOH initiating system.

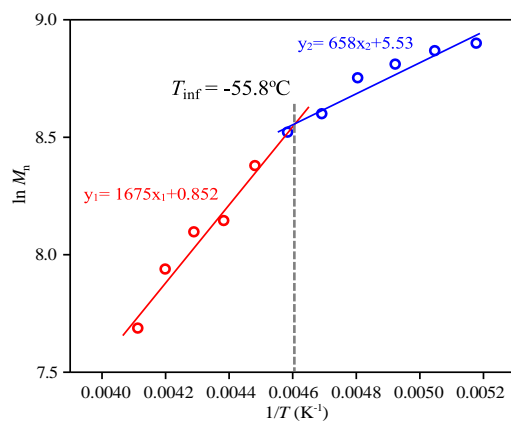

**Fig. S28** Arrhenius plots of  $\ln M_n$  versus  $1/T$  for the copolymerization of IB with HS by using *t*-BuCl/FeCl<sub>3</sub>/*i*PrOH initiating system

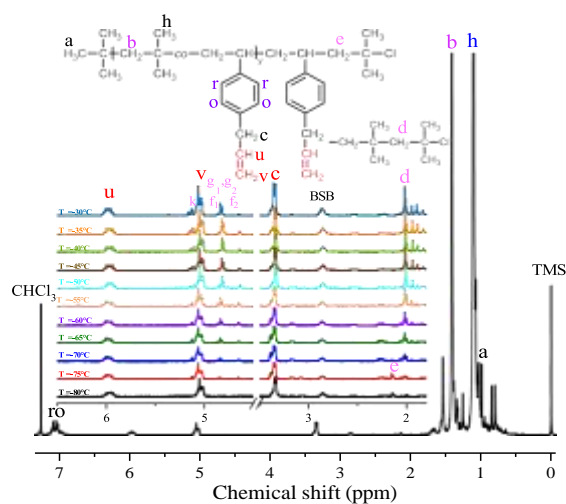

**Fig. S29** <sup>1</sup>H NMR spectra of P(IB-*co*-AS) copolymers at different copolymerization temperatures.

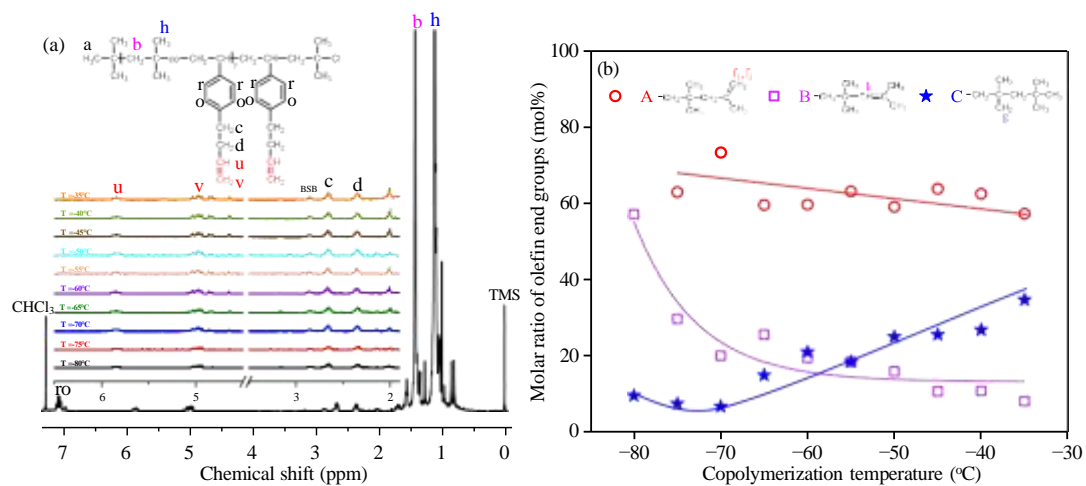

**Fig. S30** <sup>1</sup>H NMR spectra of (a) P(IB-*co*-BS) copolymers at different copolymerization temperatures and (b) molar ratio of olefin end groups in P(IB-*co*-BS) copolymers at different copolymerization temperatures.

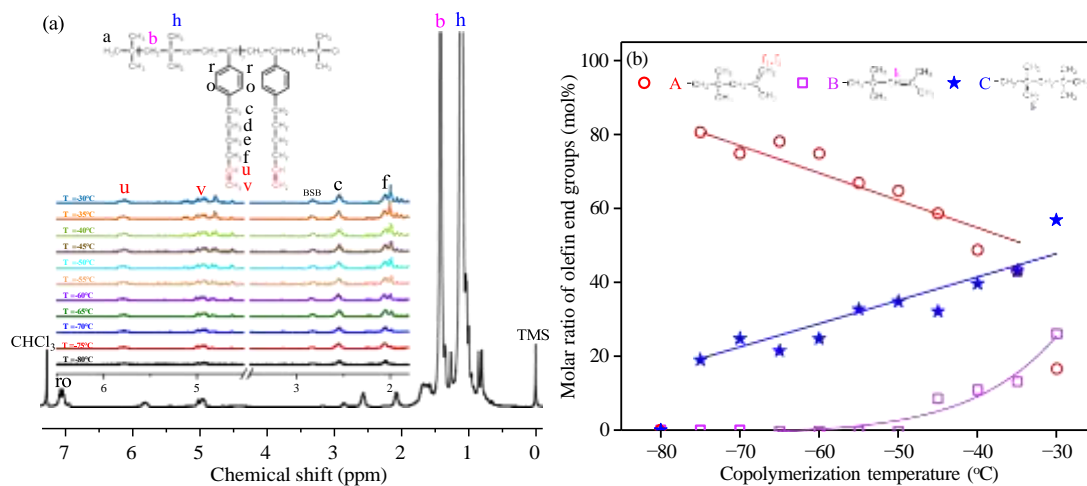

**Fig. S31** <sup>1</sup>H NMR spectra of (a) P(IB-co-HS) copolymers at different copolymerization temperatures and (b) molar ratio of olefin end groups in P(IB-co-HS) copolymers at different copolymerization temperatures.

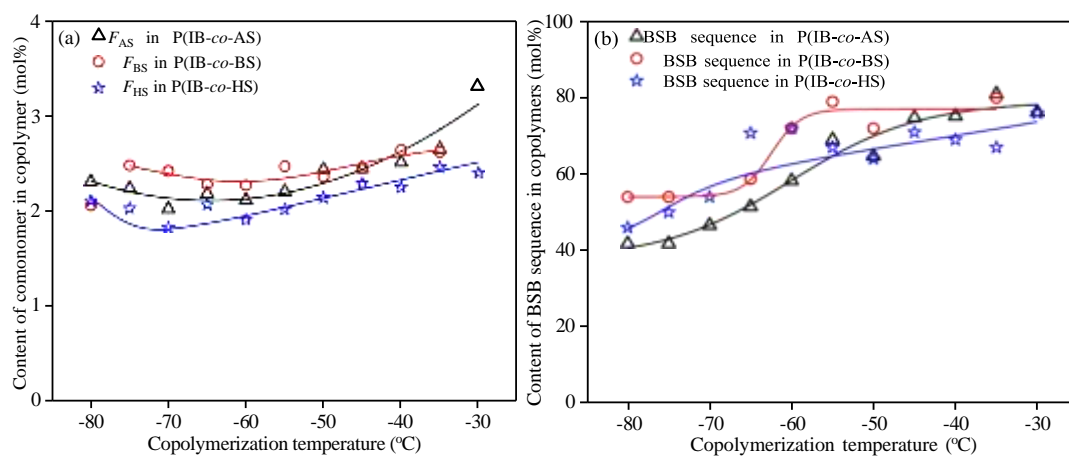

**Fig. S32** (a) Content of AS/BS/HS units and (b) content of BSB sequence in copolymers as a function of copolymerization temperature.

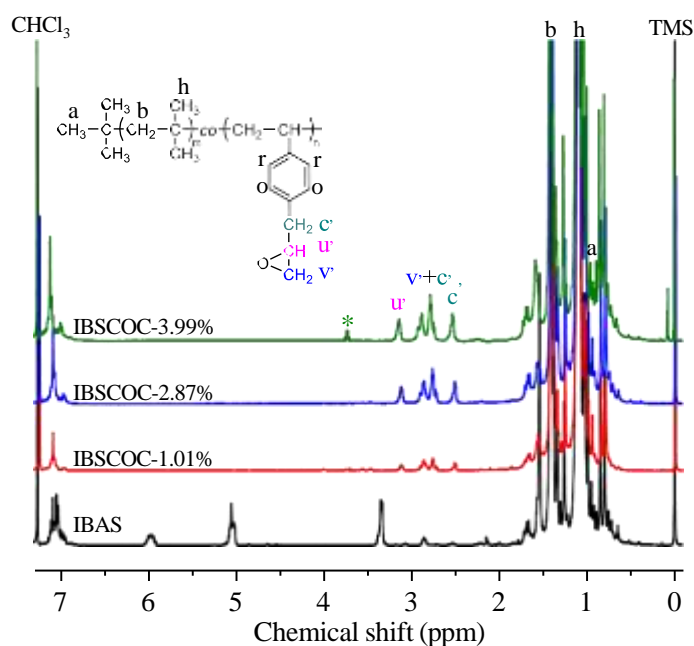

**Fig. S33** <sup>1</sup>H NMR spectra of epoxy functionalized P(IB-co-AS) with various contents of epoxy groups. (\* Impurity: ethanol)
